# Supplementary material for: Patient‐Specific or Conventional Instrumentations: A Meta‐analysis of Randomized Controlled Trials
Source: Hindawi journal article supplement (doi:10.1155/2020/2164371), 2020-01-01
Supplement: f2 [file 2164371.f2.pdf]

**Supplementary File.** Comparison of published reviews with our studies.

| <b>Reviews</b>         | <b>Number, publish year(range) and level of evidence of the included studies</b> | <b>Patients included</b>       | <b>Variables considered</b>                                                                                                                                                                                                                                                             | <b>Subgroup analysis</b>                                                                   | <b>Conclusion</b>                                                                                                                                                                                                                                                                   |
|------------------------|----------------------------------------------------------------------------------|--------------------------------|-----------------------------------------------------------------------------------------------------------------------------------------------------------------------------------------------------------------------------------------------------------------------------------------|--------------------------------------------------------------------------------------------|-------------------------------------------------------------------------------------------------------------------------------------------------------------------------------------------------------------------------------------------------------------------------------------|
| Alcelik et al. 2017    | 12<br>1950-2016<br>Level I                                                       | PSI: 538<br>CI:549             | <ul style="list-style-type: none"> <li>● <b>Radiological outcomes:</b> outliers for femoral component sagittal, coronal and rotational positioning, tibial component sagittal and coronal positioning, overall mechanical axis</li> </ul>                                               | NO                                                                                         | Our results suggest that at present PS instrumentation is <b>not superior</b> to ST instrumentation in primary total knee arthroplasty.                                                                                                                                             |
| Mannan et al. 2017     | 8<br>2000-2015<br>Level 1 :4<br>Level 2: 4                                       | 828 knees                      | <ul style="list-style-type: none"> <li>● <b>Functional outcomes:</b> KSS (function), KSS (knee), ROM, OKS, WOMAC scores.</li> </ul>                                                                                                                                                     | No                                                                                         | no conclusive evidence for or against PSI when considering short-term functional outcomes. Further high-quality studies are required to investigate both mid- and long-term outcomes as well as survivorship data.                                                                  |
| Huijbregts et al. 2016 | 21<br>2000-2015<br>Level 1 or Level 2                                            | PSI: 805<br>CI: 782            | <ul style="list-style-type: none"> <li>● <b>radiographic accuracy</b></li> <li>● <b>operation time</b></li> <li>● <b>hospital stay</b></li> <li>● <b>blood loss</b></li> <li>● <b>number of surgical trays required</b></li> <li>● <b>patient-reported outcome measures.</b></li> </ul> | hip-knee-ankle axis outliers were subgroup analyzed by different patient-specific systems. | Patient-specific instrumentation does not result in clinically meaningful improvement in alignment, fewer outliers, or better early patient-reported outcome measures. Efficiency is improved by reducing <b>the number of trays used</b> , but PSI does not reduce operation time. |
| Goyol et al. 2016      | 5<br>2000-2015<br>Level 1                                                        | 379 knees                      | <ul style="list-style-type: none"> <li>● <b>Functional outcomes: KSS, OKS, WOMAC</b></li> <li>● VAS (0-10 scale)</li> </ul>                                                                                                                                                             | No                                                                                         | Current literature is insufficient to address whether there is a benefit of PSI in total knee arthroplasty in terms of improvement in functional outcomes.                                                                                                                          |
| Thienpont et al. 2016  | 44<br>2011-2015<br>Level 1 and Level 2                                           | 2866 knees (PSI)2956 knees(CI) | <ul style="list-style-type: none"> <li>● <b>radiographic accuracy</b></li> <li>● <b>operation time</b></li> <li>● <b>blood loss</b></li> </ul>                                                                                                                                          | No                                                                                         | PSI improves the accuracy of femoral component alignment and global mechanical alignment, but at the                                                                                                                                                                                |

**Supplementary File.** Comparison of published reviews with our studies.

|            |                            |                                     |                                                                                                                                                                                                                                                                             |                                                                                                                                                                                                                                                                                                                                                                                          |                                                                                                                                                                                                                                                                                                                                                                                                                                                                                                                                                                              |
|------------|----------------------------|-------------------------------------|-----------------------------------------------------------------------------------------------------------------------------------------------------------------------------------------------------------------------------------------------------------------------------|------------------------------------------------------------------------------------------------------------------------------------------------------------------------------------------------------------------------------------------------------------------------------------------------------------------------------------------------------------------------------------------|------------------------------------------------------------------------------------------------------------------------------------------------------------------------------------------------------------------------------------------------------------------------------------------------------------------------------------------------------------------------------------------------------------------------------------------------------------------------------------------------------------------------------------------------------------------------------|
|            |                            |                                     | <ul style="list-style-type: none"> <li>● <b>patient-reported outcome measures.</b></li> </ul>                                                                                                                                                                               |                                                                                                                                                                                                                                                                                                                                                                                          | <p>cost of an increased risk of outliers for the tibial component alignment. The impact of the increased probability of tibial component malalignment on implant longevity remains to be determined. Meta-analyses indicated significant differences with regard to operative time and blood loss in favor of PSI. However, these differences were minimal and, by themselves, not a substantial justification for routine use of the technology.</p>                                                                                                                        |
| Lin et al. | 29<br>2012-2018<br>Level 1 | 2487 knees<br>PSI: 1243,<br>CI:1244 | <ul style="list-style-type: none"> <li>● <b>radiographic accuracy</b></li> <li>● <b>operation time</b></li> <li>● <b>hospital stay</b></li> <li>● <b>blood loss</b></li> <li>● <b>rate of complications</b></li> <li>● <b>patient-reported outcome measures.</b></li> </ul> | <ol style="list-style-type: none"> <li>1. Mechanical axis outliers were subgroup analyzed by different patient-specific systems and by CT- or MRI-based PSI.</li> <li>2. Operation time was subgroup analyzed by CT- or MRI- based PSI.</li> <li>3. KSS was subgroup analyzed by KSS-knee and KSS-function.</li> <li>4. Blood loss was analyzed by both volume and hemoglobin</li> </ol> | <ol style="list-style-type: none"> <li>1. Generally, PSI did not improve the alignment of mechanical axis compared with CI, but MRI-based PSI and Visionaire-specific PSI could decrease the risk of malalignment significantly.</li> <li>2. PSI could reduce operative time and blood loss and improve the KSS compared with CI, but for CT-based PSI, the difference of operative time become insignificant.</li> <li>3. PSI shown no significant difference with CI regarding risk of complication, length of stay in hospital and functional outcomes of OKS.</li> </ol> |
